# Supplementary material for: Characterization of Insecticide Response-Associated Transcripts in the Colorado Potato Beetle: Relevance of Selected Cytochrome P450s and Clothianidin
Source: MDPI journal article supplement (doi:10.3390/insects13060505), 2022-05-26
Supplement: s1 [file s1]

## Table S1.

| Dose    | Number of Insects (impaired/total) | Percentage |
|---------|------------------------------------|------------|
| 0.1 µg  | 2/5                                | 40 %       |
| 0.4 µg  | 1/5                                | 20 %       |
| 1.0 µg  | 4/5                                | 80 %       |
| 2.5 µg  | 5/5                                | 100 %      |
| 5.0 µg  | 5/5                                | 100 %      |
| 10.0 µg | 5/5                                | 100 %      |
| 20.0 µg | 5/5                                | 100 %      |

Table S1. Impact of clothianidin treatment on *L. decemlineata*.  
Presented are effects on insects exposed to varying doses of clothianidin.
